# Supplementary material for: One-year follow-up of a short specific carbohydrate diet intervention in children with juvenile idiopathic arthritis: A retrospectively controlled study with focus on medical burden
Source: Springer Nature journal article supplement (doi:10.1007/s10067-025-07421-z), 2025-04-02

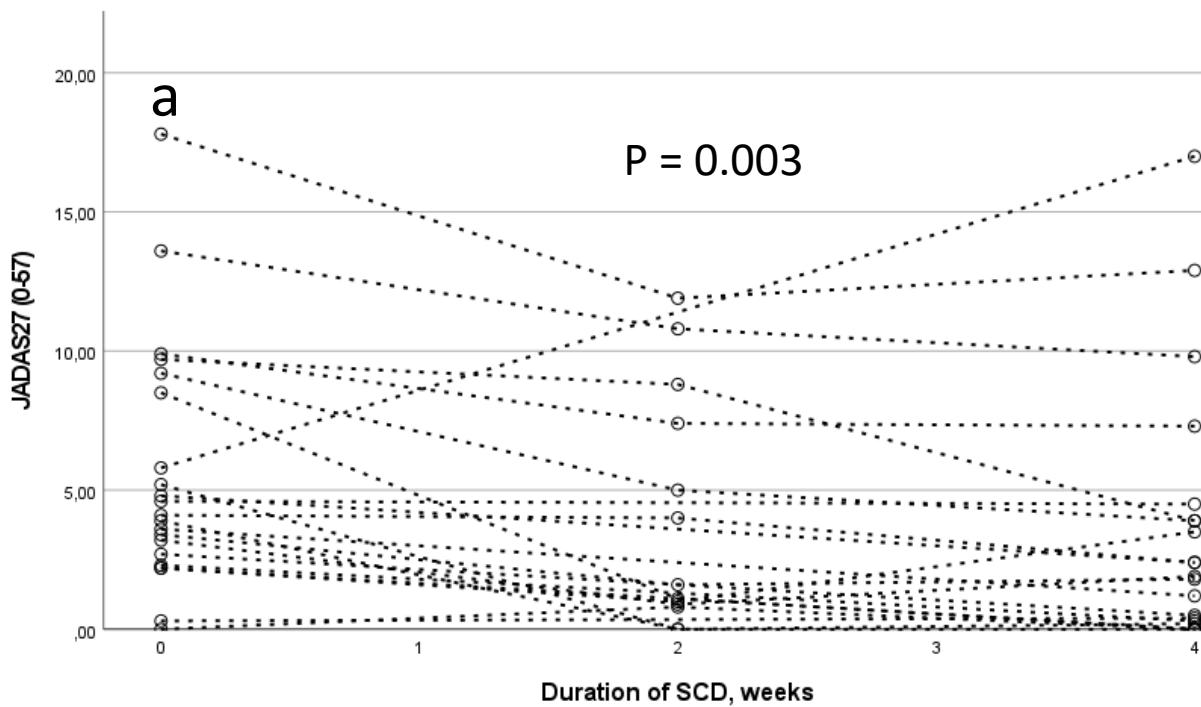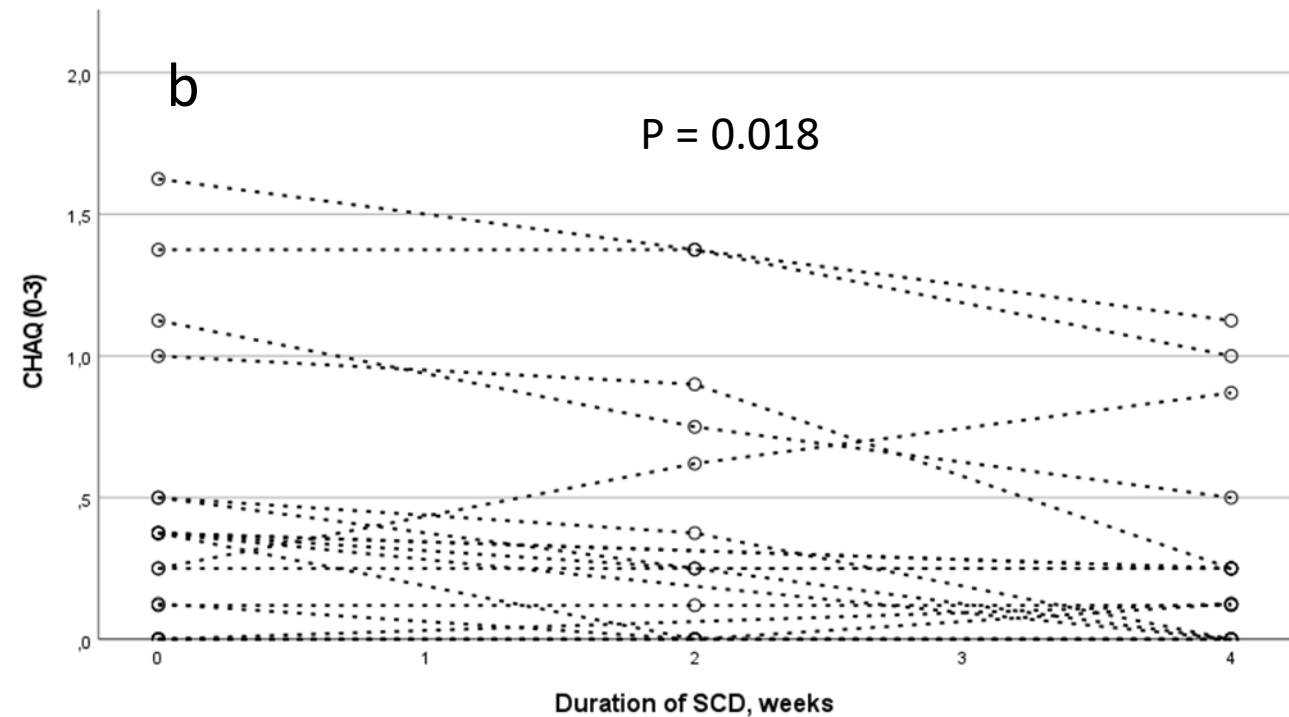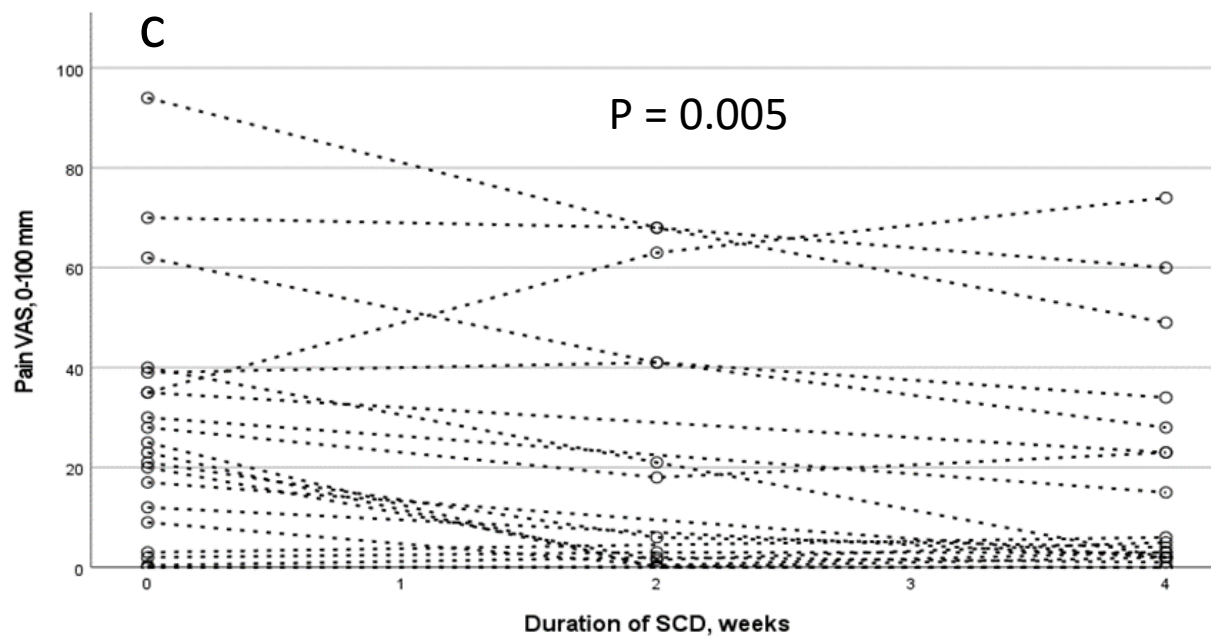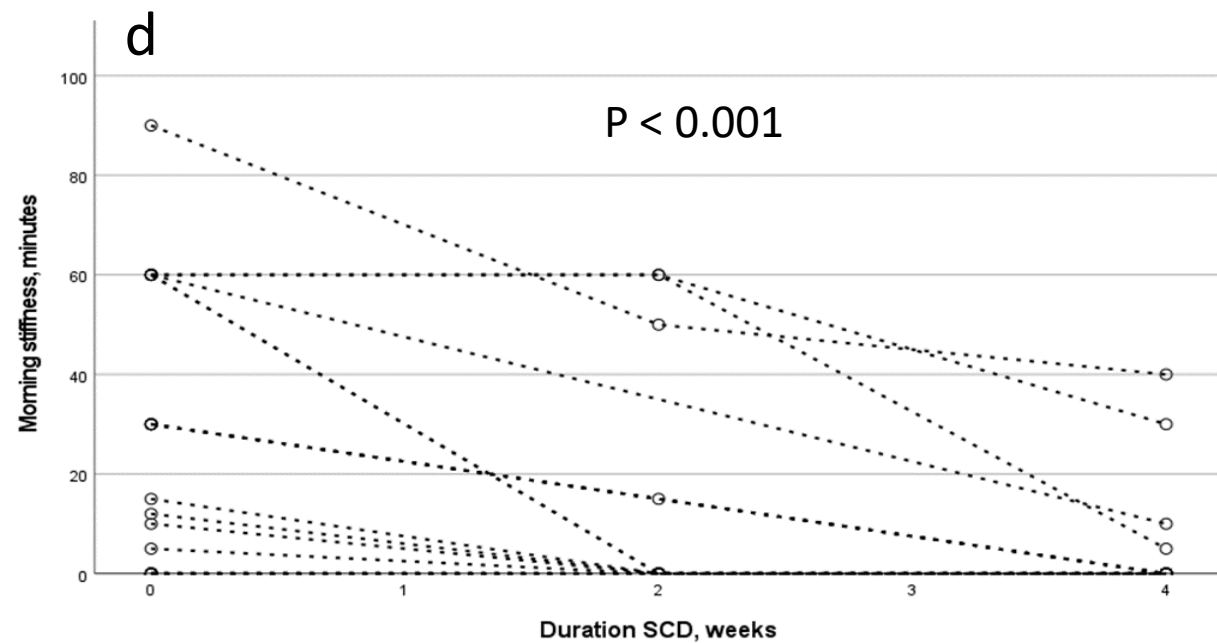

Supplement: MOESM1 [file 10067_2025_7421_MOESM1_ESM.pdf]
